# Supplementary material for: A theoretical study on synergistic tuning of graphene phonons via heteroatom modifications
Source: Royal Society of Chemistry journal article supplement (doi:10.1039/d5cp00791g), 2025-01-01
Supplement: d5cp00791g1.pdf [file d5cp00791g1.pdf]

# **Supporting Information:**

## **Theoretical Study on Synergistic Tuning of Graphene Phonons via Heteroatom Modifications**

Shuang Li,<sup>a</sup> Lifeng Zhang,<sup>a</sup> Langli Luo<sup>\*a,b</sup> and Xing Chen<sup>\*a,b,c</sup>

<sup>a</sup> Institute of Molecular Plus, School of Chemical Engineering and Technology,  
Tianjin University, Tianjin 300072, China

<sup>b</sup> Haihe Laboratory of Sustainable Chemical Transformations, Tianjin 300192, China

<sup>c</sup> Tianjin Key Laboratory of Low-Dimensional Electronic Materials and Advanced  
Instrumentation, Tianjin, China

\*: Corresponding Author: [luolangli@tju.edu.cn](mailto:luolangli@tju.edu.cn), [xing\\_chen@tju.edu.cn](mailto:xing_chen@tju.edu.cn)

**Table S1.** Calculated highest optical phonon mode at the  $\Gamma$  point for pristine and functionalized graphene systems.

| System                     | Highest Optical Mode ( $\Gamma$ ) (THz) | Energy (meV) | Raman Shift ( $\text{cm}^{-1}$ ) | Shift vs. G $1580 \text{ cm}^{-1}$ ( $\text{cm}^{-1}$ ) |
|----------------------------|-----------------------------------------|--------------|----------------------------------|---------------------------------------------------------|
| Pristine Graphene          | 41.65                                   | 172.23       | 1388.8                           | -191.2                                                  |
| N-doped Graphene           | 44.47                                   | 183.84       | 1483.2                           | -96.8                                                   |
| Au-loaded Graphene         | 47.43                                   | 196.2        | 1582.2                           | +2.2                                                    |
| N-doped-Au-loaded Graphene | 45.33                                   | 187.41       | 1511.7                           | -68.3                                                   |

The corresponding energy (in meV) and Raman shift (in  $\text{cm}^{-1}$ ) are provided, along with the relative shift compared to the typical G band position at  $1580 \text{ cm}^{-1}$ , which originates from the in-plane  $E_{2g}$  mode of  $\text{sp}^2$ -carbon<sup>2</sup>. The Raman shift values were obtained by converting the phonon frequency at the  $\Gamma$  point into wavenumber using the relation  $1 \text{ THz} \approx 33.356 \text{ cm}^{-1}$ , and the deviation from  $1580 \text{ cm}^{-1}$  serves as a reference to assess the redshift or blueshift of the G band under different functionalizations<sup>3</sup>. Here, a “redshift” indicates that the Raman shift is lower than  $1580 \text{ cm}^{-1}$  (i.e., a shift toward lower frequencies), while a “blueshift” denotes a shift toward higher frequencies.

**Table S2.** Calculated highest optical phonon mode at the K point for pristine and functionalized graphene systems

| System                            | Highest Optical Mode (K) (THz) | Energy (meV) | Raman Shift (cm <sup>-1</sup> ) |
|-----------------------------------|--------------------------------|--------------|---------------------------------|
| <b>Pristine Graphene</b>          | 45.47                          | 187.9        | 1516.4                          |
| <b>N-doped Graphene</b>           | 47.06                          | 194.61       | 1570.1                          |
| <b>Au-loaded Graphene</b>         | 47.35                          | 195.94       | 1579.2                          |
| <b>N-doped-Au-loaded Graphene</b> | 46.86                          | 193.75       | 1563.1                          |

Table S2 presents the calculated highest optical phonon mode at the K point for pristine and functionalized graphene systems. The values presented herein were derived by extracting the highest optical phonon mode at the K point from the phonon dispersion curves (refer to Figure 2). The corresponding Raman shift (cm<sup>-1</sup>) was computed using a conversion factor of 1 THz  $\approx$  33.356 cm<sup>-1</sup>.<sup>3</sup>

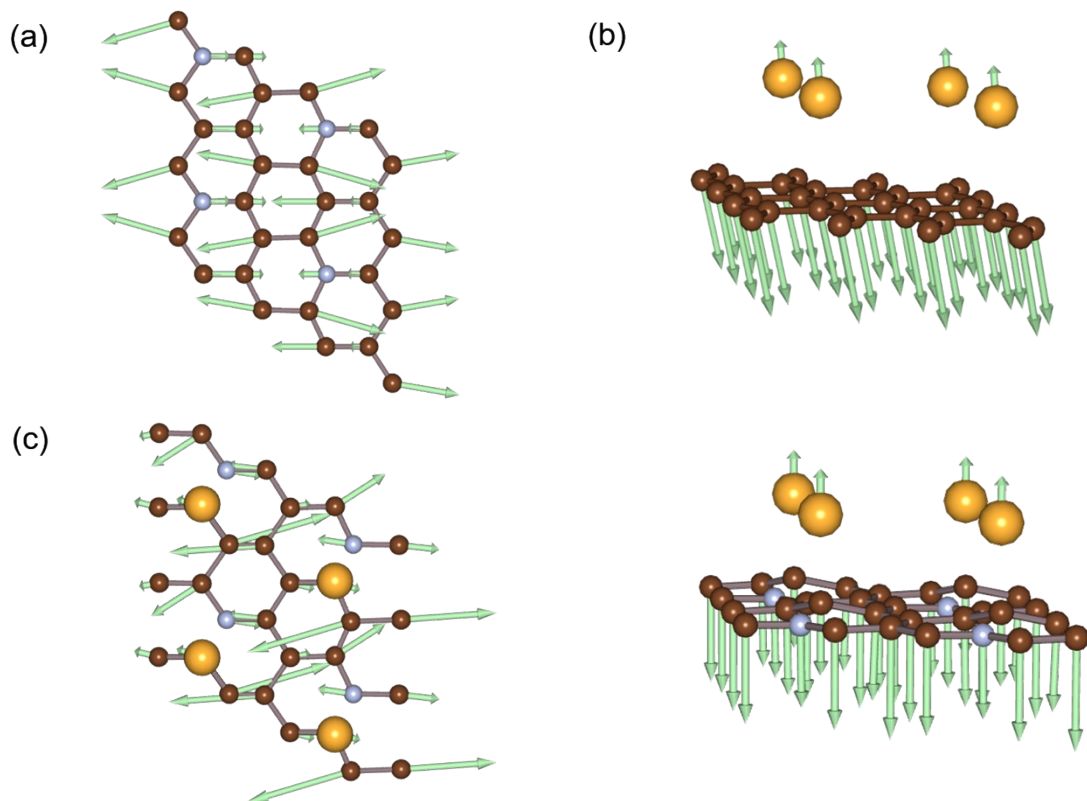

**Figure S1.** Representative vibrations in modified graphene. (a) N-doped graphene, (b) Au-loaded graphene, (c) N-doped-Au-loaded graphene.

Figure S1 shows representative phonon modes in various modified graphene systems. (a) shows a high-frequency vibration ( $\sim 46.79$  THz) at the M point in N-doped graphene, corresponding to in-plane stretching between N and C atoms. (b) shows a low-frequency vibration ( $\sim 0.95$  THz) at the  $\Gamma$  point in Au-loaded graphene, characterized by an out-of-plane “breathing” vibration. (c) shows two distinct vibrations in N-doped–Au-loaded graphene: the left shows a high-frequency vibration ( $\sim 46.79$  THz) at the M point, while the right displays a low-frequency vibration ( $\sim 5.13$  THz) at the  $\Gamma$  point. This comparison indicates that dual heteroatom modification induces diverse phonon characteristics. Arrows indicate the direction and relative amplitude of atomic displacements.

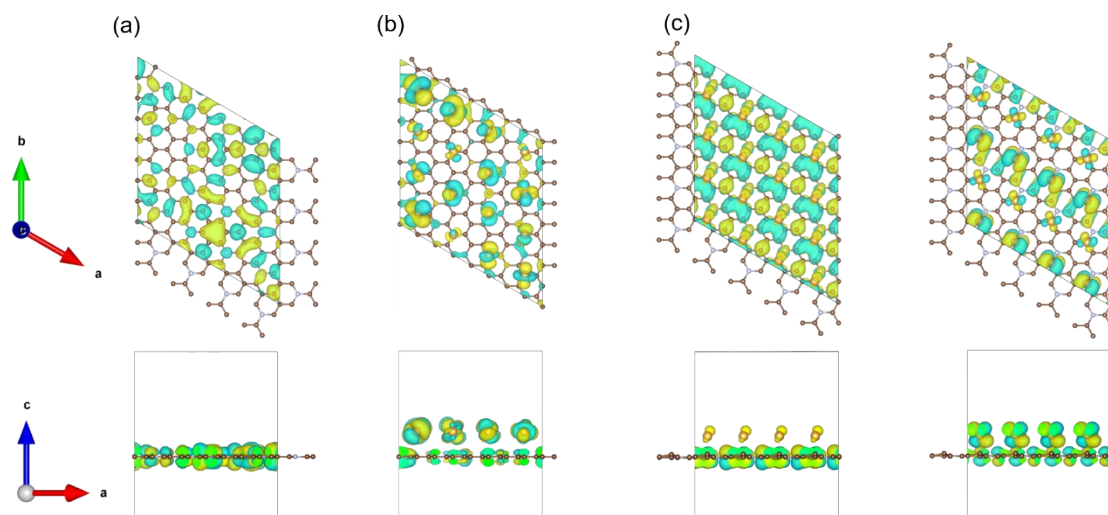

**Figure S2.** Real-space isosurface plots of representative electronic states for modified graphene. (a) N-doped graphene, (b) Au-loaded graphene, (c) N doped-Au loaded graphene.

Figure S2 illustrates real-space isosurface plots of representative electronic states obtained from DFT calculations for modified Graphene. Figure S2a shows N-doped graphene at the Fermi level, which exhibits a strongly localized electronic density on the substitutional N atom and its nearest-neighbor C atoms, confirming that the new PDOS feature in Figure 3b originates from N 2p-C 2p hybridization. Figure S2b shows Au-loaded graphene, where the state at -1.5 eV displays a wavefunction confined to the Au adatom, indicating that the sharp PDOS peak in Figure 3c is dominated by Au 5d orbitals; this localization on a heavy element is consistent with the emergence and reinforcement of low-frequency out-of-plane vibrations. Figure S2c shows dual-modified (N-doped-Au-loaded) graphene in two views: the left side displays the Fermi level state with the same N-centered localization as in Figure S2a, whereas the right side at -2.5 eV highlights Au 5d; the coexistence of N- and Au-centered states on the same lattice suggests a synergistic effect on the surrounding C atoms, thereby rationalizing the coupling character and the frequency shift of the calculated phonon

modes. For better visualization of the spatial distribution, the upper panels are presented in a top view, while the lower panels are presented in a side view.

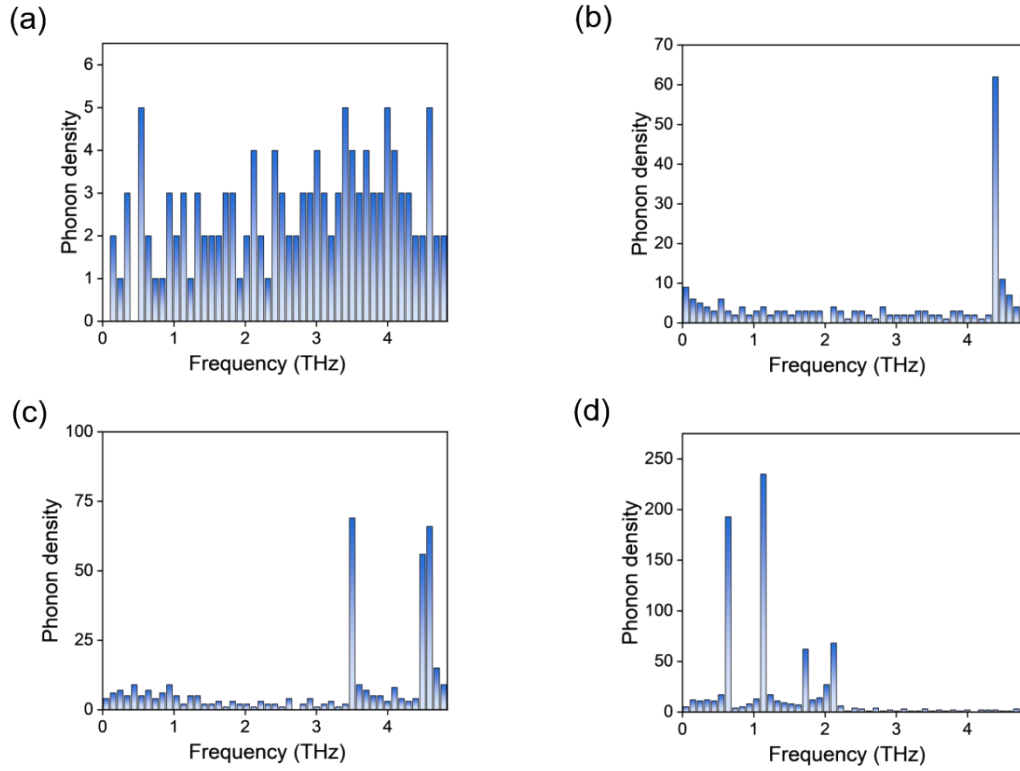

**Figure S3.** (a) Phonon density in the frequency range of 0-4.837 THz (0-20 meV) of pristine graphene, (b) N-doped graphene, (c) Au-loaded graphene, (d) and N-doped-Au-loaded graphene.

Figure S3 illustrates the phonon density within the frequency range of 0-4.837 THz (0-20 meV). The X-axis denotes the frequency (in THz), while the Y-axis represents the phonon density, defined as the number of modes within each frequency interval. As depicted in Figure S1, the number of phonon modes in the 0-20 meV range increases for N-doped graphene and Au-loaded graphene. The N-doped-Au-loaded graphene exhibits a notable increase in the number of modes within this range.

## References

- 1 A. C. Ferrari and J. Robertson, Interpretation of Raman spectra of disordered and amorphous carbon, *Phys. Rev. B*, 2000, **61**, 14095–14107.
- 2 M. S. Dresselhaus, A. Jorio, M. Hofmann, G. Dresselhaus and R. Saito, Perspectives on Carbon Nanotubes and Graphene Raman Spectroscopy, *Nano Lett.*, 2010, **10**, 751–758.
- 3 J. Wang, H. Xie and Z. Guo, First-principles investigation on thermal properties and infrared spectra of imperfect graphene, *Applied Thermal Engineering*, 2017, **116**, 456–462.
